# Supplementary material for: Efficacy of AAV9-mediated SGPL1 gene transfer in a mouse model of S1P lyase insufficiency syndrome
Source: PubMed Central journal article supplement (PMC8119223; doi:10.1172/jci.insight.145936), 2021-04-22
Supplement: jciinsight-6-145936-s173.pdf [file jciinsight-6-145936-s173.pdf]

Supplementary Materials

for Zhao et al,

“Long-term survival in a mouse model of S1P lyase insufficiency syndrome (SPLIS) after treatment with AAV9-mediated *SGPL1* gene transfer”

1. Supplementary Table 1. qRT-PCR primers used in this study
2. Supplementary Table 2. Hematological parameters in WT mice treated with AAV-SPL
3. Supplementary Figure 1. Liver ceramide levels in AAV-SPL treated *Sgpl1* KO mice
4. Supplementary Figure 2. Antibody responses to AAV9 and hSPL in treated and untreated *Sgpl1* KO mice

**Supplementary Table 1. qRT-PCR primers used in this study**

| <b>Primer Name</b> | <b>Primer Sequence</b>        |
|--------------------|-------------------------------|
| hSPL-forward       | CAA GAC CAA GGA TGA TAT TAG C |
| hSPL-reverse       | CAG AAG GCG TCC ATA GAG       |
| mGAPDH-forward     | ACC TGC CAA GTA TGA TGA       |
| mGAPDH-reverse     | GGA GTT GCT GTT GAA GTC       |
| mSPL-forward       | CTC CGA CCT GTC CTG ATT       |
| mSPL-reverse       | TAA CTG CTT CCT GCC TGA T     |
| mMCP1 Fwd          | TTAAAAACCTGGATCGGAACCAA       |
| mMCP1 Rev          | GCATTAGCTTCAGATTTACGGGT       |
| mSPL Fwd           | CTGAAGGACTTCGAGCCTTATTT       |
| mSPL Rev           | ACTCCACGCAATGAGCTGC           |
| mLCN2 Fwd          | TGGCCCTGAGTGTTCATGTG          |
| mLCN2 Rev          | CTCTTGTAGCTCATAGATGGTGC       |
| mSOCS1 Fwd         | CTGCGGCTTCTATTGGGGAC          |
| mSOCS1 Rev         | AAAAGGCAGTCCAAGGTCTCG         |
| mSOCS3 Fwd         | CCCTTGCAAGTTCTAAGTTCAACA      |
| mSOCS3 Rev         | ACCTTTGACAAGCGGACTCTC         |
| mTIMP1 Fwd         | GCAACTCGGACCTGGTCATAA         |
| mTIMP1 Rev         | CGGCCCGTGATGAGAAACT           |
| mTNF alpha Fwd     | CAGGCGGTGCCTATGTCTC           |
| mTNF alpha Rev     | CGATCACCCCGAAGTTCAGTAG        |
| mIL1b Fwd          | TTCAGGCAGGCAGTATCACTC         |
| mIL1b Rev          | GAAGGTCCACGGGAAAGACAC         |
| mIFN gamma Fwd     | ACAGCAAGGCGAAAAAGGATG         |
| mIFN gamma Rev     | TGGTGGACCACTCGGATGA           |
| mTgfb-1 Fwd        | CCACCTGCAAGACCATCGAC          |
| mTgfb-1 Rev        | CTGGCGAGCCTTAGTTTGGAC         |
| mIL6 Fwd           | TAGTCCTTCTACCCCAATTTCC        |
| mIL6 Rev           | TTGGTCCTAGCCACTCCTTC          |

**Supplementary Table 2. Hematological parameters in WT mice treated with AAV-SPL**

| Genotype-Treatment | WBC (K/uI) | Absolute Neutrophil cells (K/uI) | Absolute Lymphocyte cells (K/uI) | Absolute Monocyte cells (K/uI) | Absolute Eosinophil cells (K/uI) | Absolute Basophil cells (K/uI) | Neutrophil % | Lymphocyte % | Monocyte % | Eosinophil % | Basophil % | RBC (M/uI) | Hemoglobin (g/dL) | Hematocrit % | MCV (fL) | MCH (pg) | MCHC (g/dL) | RDW % | Platelets (K/uL) | MPV (fL) |
|--------------------|------------|----------------------------------|----------------------------------|--------------------------------|----------------------------------|--------------------------------|--------------|--------------|------------|--------------|------------|------------|-------------------|--------------|----------|----------|-------------|-------|------------------|----------|
| WT-hSPL            | 11.84      | 2.39                             | 8.59                             | 0.73                           | 0.11                             | 0.03                           | 20.17        | 72.57        | 6.13       | 0.89         | 0.25       | 10.78      | 14.6              | 46.7         | 43.3     | 13.5     | 31.3        | 19.4  | 1033             | 5.9      |
| WT-hSPL            | 13.18      | 3.50                             | 8.75                             | 0.82                           | 0.11                             | 0.01                           | 26.52        | 66.38        | 6.21       | 0.85         | 0.04       | 9.43       | 13.1              | 41.8         | 44.3     | 13.9     | 31.3        | 19.8  | 1242             | 5.9      |
| WT-hSPL            | 14.64      | 3.99                             | 9.41                             | 0.60                           | 0.50                             | 0.15                           | 27.22        | 64.25        | 4.09       | 3.43         | 1.01       | 10.09      | 14.7              | 44.1         | 43.7     | 14.6     | 33.3        | 20.1  | 644              | 6.2      |
| WT                 | 11.30      | 2.58                             | 7.92                             | 0.65                           | 0.13                             | 0.03                           | 22.80        | 70.07        | 5.76       | 1.11         | 0.25       | 9.73       | 13.2              | 42.2         | 43.4     | 13.6     | 31.3        | 19.4  | 984              | 5.7      |
| WT                 | 12.84      | 2.92                             | 8.81                             | 0.77                           | 0.27                             | 0.06                           | 22.77        | 68.61        | 6.02       | 2.13         | 0.48       | 10.57      | 14.8              | 45.3         | 42.9     | 14.0     | 32.7        | 19.6  | 901              | 5.9      |
| WT                 | 11.16      | 2.59                             | 7.41                             | 0.60                           | 0.45                             | 0.11                           | 23.24        | 66.38        | 5.38       | 4.03         | 0.98       | 9.59       | 13.2              | 39.5         | 41.2     | 13.8     | 33.4        | 17.9  | 656              | 5.7      |
| HET                | 14.32      | 3.97                             | 9.06                             | 0.74                           | 0.41                             | 0.13                           | 27.72        | 63.29        | 5.19       | 2.86         | 0.94       | 10.22      | 14.6              | 44.9         | 43.9     | 14.3     | 32.5        | 19.1  | 902              | 6.5      |
| HET                | 12.80      | 2.65                             | 9.22                             | 0.71                           | 0.19                             | 0.03                           | 20.67        | 72.06        | 5.57       | 1.50         | 0.20       | 9.95       | 13.8              | 41.8         | 42.0     | 13.9     | 33.0        | 19.5  | 897              | 6.2      |
| HET                | 15.54      | 3.76                             | 10.80                            | 0.69                           | 0.25                             | 0.04                           | 24.22        | 69.48        | 4.43       | 1.63         | 0.25       | 10.61      | 15.3              | 46.3         | 43.6     | 14.4     | 33.0        | 19.2  | 1035             | 6.3      |

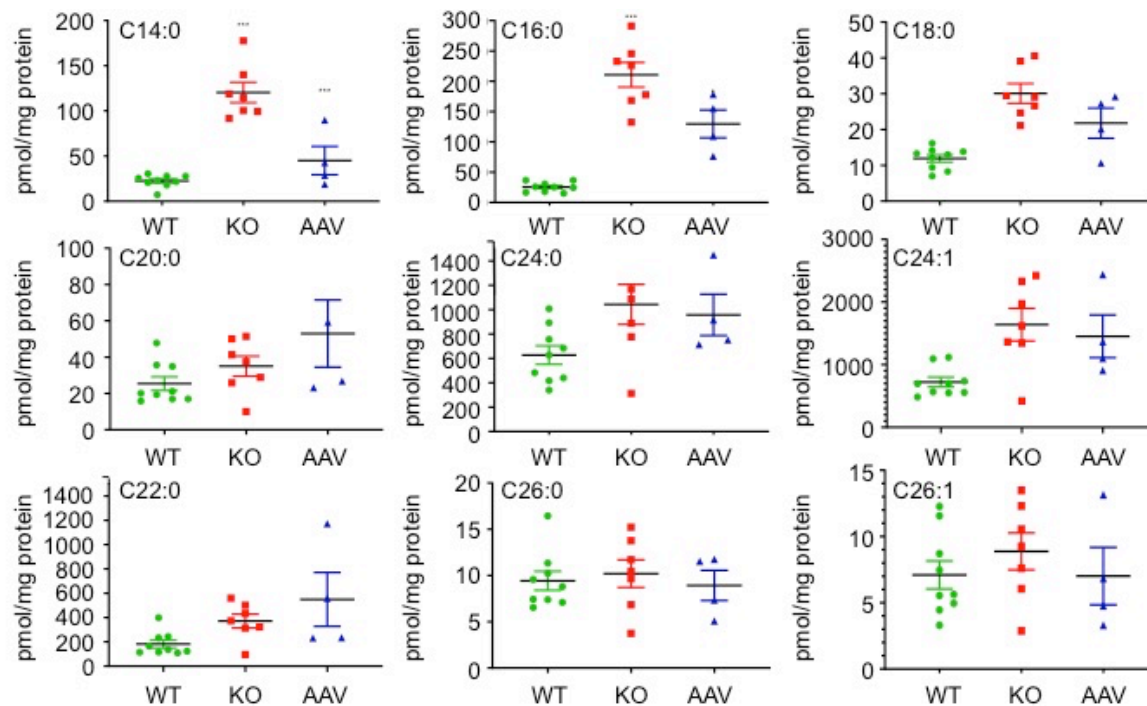

**Supplementary Figure 1. Liver ceramide levels in AAV-SPL treated *Sgpl1* KO mice.** Shown are the levels of different ceramide species measured by LC-MS/MS in the liver tissues of untreated wild type (WT; n=9), untreated *Sgpl1* knockout (KO; n=7) and AAV-SPL treated KO (AAV; n=4) mice. Ceramides are labeled with respect to fatty acid chain length and saturation. For C14:0: WT vs. KO,  $p < 1 \times 10^{-5}$ ; WT vs. AAV, NSD; KO vs. AAV,  $p < 0.008$ . For C16:0: WT vs. KO,  $p < 1 \times 10^{-5}$ ; WT vs. AAV,  $p < 0.02$ ; KO vs. AAV,  $p < 0.02$ . For C18:0: WT vs. KO,  $p < 0.003$ ; WT vs. AAV, no significant difference (NSD); KO vs. AAV, NSD. For C22:0: WT vs. KO,  $p < 0.02$ ; WT vs. AAV and KO vs. AAV, NSD. For C24:0: WT vs. KO,  $p < 0.05$ ; WT vs. AAV and KO vs. AAV, NSD. For C20:0, C26:0, C24:1 and C26:1, NSD for all comparisons.

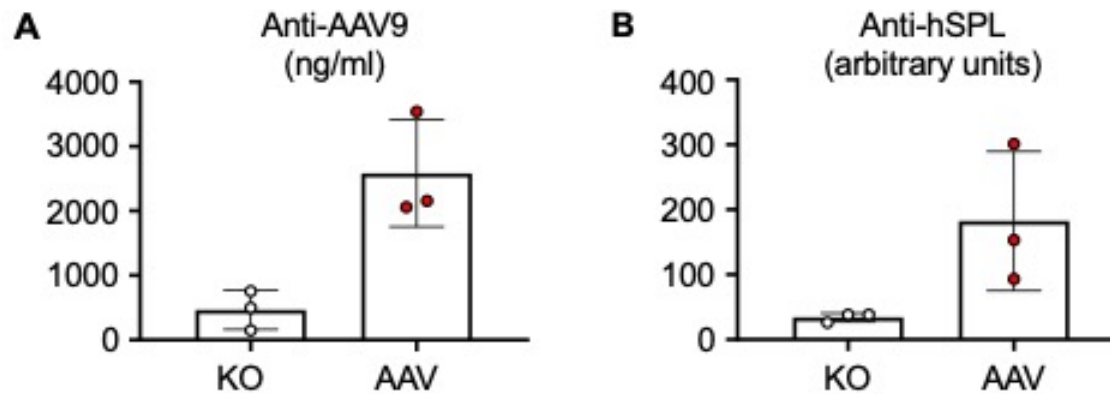

**Supplementary Figure 2. Antibody responses to AAV9 and hSPL in treated and untreated *Sgpl1* KO mice.** (A) Anti-AAV9 antibodies detected in the plasma of untreated (KO) and AAV-SPL treated (AAV) *Sgpl1* KO mice (n = 3/group). Anti-AAV9 mouse monoclonal antibodies of known concentration were tested by ELISA against AAV9 virus over a range of concentrations to establish a standard curve. Results are reported in ng/ml. Using unpaired t test, for KO vs. AAV,  $p = 0.014$ . (B) Anti-hSPL antibodies detected in the plasma of KO and AAV mice. Anti-hSPL mouse monoclonal antibodies in the form of ascites of unknown concentration were used in serial dilutions with purified hSPL protein to confirm antibody specificity. Antibody in plasma samples could not be quantified in absolute values and is reported in relative absorbance units. For B, KO vs. AAV, there was no significant difference.
